# Supplementary material
Source: publisher figshare collection journal article supplement (https://diabetesjournals.figshare.com/articles/dataset/_/12777074)
Supplement: Supplementary file 1 [file 1]

Supplemental Table

| <b>Supplemental Table 1. Primers used for qRT-PCR</b> |                        |                            |
|-------------------------------------------------------|------------------------|----------------------------|
| Gene                                                  | Forward                | Reverse                    |
| <i>ARF4</i>                                           | CCCTCTTCTCCCGACTATTTGG | GCACAAGTGGCTTGAACATACC     |
| <i>ATF3</i>                                           | GCTGTCACCACGTGCAGTAT   | TTTGTGTTAACGCTGGGAGA       |
| <i>CREB3</i>                                          | AAAGTGGAGATTTGGGGACG   | CGCTCGGTACCTCAGAAAG        |
| <i>ACTB</i>                                           | AGGTCATCACTATTGGCAACGA | CACTTCATGATGGATTGAATGTAGTT |
| TaqMan Primers                                        |                        |                            |
| <i>COG6</i>                                           | Hs01037401_m1          |                            |
| <i>GOSR2</i>                                          | Hs03004084_m1          |                            |
| <i>ACTB</i>                                           | Hs99999903_m1          |                            |
